# Supplementary material for: B-Cell Regeneration Profile and Minimal Residual Disease Status in Bone Marrow of Treated Multiple Myeloma Patients
Source: PubMed Central journal article supplement (PMC8038337; doi:10.3390/cancers13071704), 2021-04-03
Supplement: cancers-13-01704-s001.pdf [file cancers-13-01704-s001.pdf]

## Supplementary Materials:

# B-Cell Regeneration Profile and Minimal Residual Disease Status in Bone Marrow of Treated Multiple Myeloma Patients

Robéria Mendonça de Pontes, Juan A. Flores-Montero, Luzalba Sanoja-Flores, Noemi Puig, Roberto J. Pessoa de Magalhães, Alba Corral-Mateos, Anna Beatriz Salgado, Omar García-Sánchez, José Pérez-Morán, Maria-Victoria Mateos, Leire Burgos, Bruno Paiva, Jeroen te Marvelde, Vincent H.J. van der Velden, Carlos Aguilar, Abelardo Báñez, Aranzazú García-Mateo, Jorge Labrador, Pilar Leoz, Carmen Aguilera-Sanz, Brian Durie, Jacques J.M. van Dongen, Angelo Maiolino, Elaine Sobral da Costa and Alberto Orfao on behalf of the EuroFlow Consortium

**Table S1.** Clinical and laboratory features observed at diagnosis for the MM patients included in this study (n = 162).

| Disease Features                     |                | % Patient Distribution |
|--------------------------------------|----------------|------------------------|
| Sex                                  | Male           | 57%                    |
|                                      | Female         | 43%                    |
| Age at diagnosis                     | < 65y          | 62%                    |
|                                      | ≥ 65y          | 38%                    |
| ISS stage                            | I              | 39%                    |
|                                      | II             | 30%                    |
|                                      | III            | 31%                    |
| Cytogenetic risk*                    | High           | 29%                    |
|                                      | Low            | 71%                    |
| Serum $\beta$ 2-microglobulin (mg/L) | <5.5           | 69%                    |
|                                      | ≥ 5.5          | 31%                    |
| Albumin (mg/L)                       | < 3.5          | 34%                    |
|                                      | ≥ 3.5          | 66%                    |
| LDH (U/L)                            | Normal         | 65%                    |
|                                      | Increased      | 35%                    |
| Type of M-component                  | IgG            | 61%                    |
|                                      | IgA            | 19%                    |
|                                      | IgD            | 1%                     |
|                                      | BJ             | 13%                    |
|                                      | Oligosecretory | 3%                     |
|                                      | Non-secretory  | 3%                     |

Abbreviations: ISS, international staging system; LDH, lactate dehydrogenase; BJ, Bence-Jones; NA, not available. High-risk cytogenetic include del(17/17p), t(4;14), t(14;16) and/or, t(14;20). \*not available in 59/162 cases.

**Table S2.** Distribution of maturation-associated normal/residual B-cell and nPC cell population in BM of HD *vs.* MM patients studied at diagnosis and at different time points after therapy.

| Cell population (%)                            | Multiple myeloma           |                                            |                                            |                                             |
|------------------------------------------------|----------------------------|--------------------------------------------|--------------------------------------------|---------------------------------------------|
|                                                | HD<br>(n = 14)             | At diagnosis<br>(n = 25)                   | End of Induction<br>(n = 27)               | Post-ASCT<br>(day + 100) (n = 94)           |
| <b>Total B-cells</b>                           | <b>2.6</b><br>(1–4.6)      | <b>1.2<sup>a</sup></b><br>(0.4–3.3)        | <b>0.8<sup>a</sup></b><br>(0.3–5)          | <b>3.3<sup>b</sup></b><br>(0.05–11.4)       |
| <b>Pre-germinal center B-cells</b>             | <b>1.7</b><br>(0.4–3.3)    | <b>0.5<sup>a</sup></b><br>(0.07–2.2)       | <b>0.5<sup>a</sup></b><br>(0.1–4.5)        | <b>3.1<sup>a, b</sup></b><br>(0.003–11.2)   |
| BCP                                            | <b>0.3</b><br>(0.09–1.7)   | <b>0.01<sup>a</sup></b><br>(<0.0002–0.8)   | <b>0.3<sup>b</sup></b><br>(<0.0002–2.3)    | <b>1.5<sup>a, b</sup></b><br>(0.002–10.3)   |
| Stage I BCP                                    | <b>0.02</b><br>(0.006–0.2) | <b>0.0005<sup>a</sup></b><br>(<0.0002–0.1) | <b>0.02<sup>b</sup></b><br>(<0.0002–0.7)   | <b>0.2<sup>a, b</sup></b><br>(<0.0002–0.9)  |
| Stage II BCP                                   | <b>0.3</b><br>(0.09–1.5)   | <b>0.01<sup>a</sup></b><br>(<0.0002–0.7)   | <b>0.2<sup>b</sup></b><br>(<0.0002–2.1)    | <b>1.3<sup>a, b</sup></b><br>(0.002–9.4)    |
| Stage I / stage II BCP ratio                   | <b>0.1</b><br>(0.04–0.2)   | <b>0.02<sup>a</sup></b><br>(0–0.2)         | <b>0.1<sup>b</sup></b><br>(0–1.6)          | <b>0.09<sup>b</sup></b><br>(0–1.2)          |
| Transitional/naïve B-cells                     | <b>1.1</b><br>(0.3–2)      | <b>0.4<sup>a</sup></b><br>(0.05–1.9)       | <b>0.2<sup>a, b</sup></b><br>(0.004–2.5)   | <b>1.5<sup>b</sup></b><br>(0.008–5.7)       |
| <b>Post-germinal center B-cells</b>            | <b>0.8</b><br>(0.4–1.4)    | <b>0.4<sup>a</sup></b><br>(0.1–1.6)        | <b>0.2<sup>a, b</sup></b><br>(0.03–0.6)    | <b>0.1<sup>a, b</sup></b><br>(0.009–0.9)    |
| Memory B-cells                                 | <b>0.4</b><br>(0.06–1.3)   | <b>0.3</b><br>(0.05–1.5)                   | <b>0.07<sup>a, b</sup></b><br>(0.005–0.5)  | <b>0.03<sup>a, b</sup></b><br>(0.0005–0.5)  |
| nPC                                            | <b>0.3</b><br>(0.08–0.9)   | <b>0.04<sup>a</sup></b><br>(0.005–0.5)     | <b>0.06<sup>a</sup></b><br>(0.008–0.4)     | <b>0.08<sup>a, b</sup></b><br>(0.002–0.8)   |
| CD19 <sup>+</sup> nPC                          | <b>0.2</b><br>(0.03–0.6)   | <b>0.03<sup>a</sup></b><br>(0.002–0.4)     | <b>0.05<sup>a</sup></b><br>(0.006–0.4)     | <b>0.07<sup>a, b</sup></b><br>(<0.0002–0.8) |
| CD19 <sup>-</sup> nPC                          | <b>0.1</b><br>(0.02–0.3)   | <b>0.006<sup>a</sup></b><br>(<0.0002–0.08) | <b>0.009<sup>a</sup></b><br>(<0.0002–0.07) | <b>0.007<sup>a</sup></b><br>(<0.0002–0.2)   |
| CD19 <sup>+</sup> /CD19 <sup>-</sup> nPC ratio | <b>2</b><br>(0.7–8.6)      | <b>2.2</b><br>(0–18.6)                     | <b>5.8<sup>a, b</sup></b><br>(0–147)       | <b>8.6<sup>a, b</sup></b><br>(0–42.4)       |
| <b>Mature B-cells ‡</b>                        | <b>1.5</b><br>(0.4–3)      | <b>0.8<sup>a</sup></b><br>(0.1–2.8)        | <b>0.4<sup>a, b</sup></b><br>(0.009–2.6)   | <b>1.5<sup>b</sup></b><br>(0.004–5.9)       |
| <b>BCP/Mature B-cell ratio</b>                 | <b>0.2</b><br>(0.08–1.6)   | <b>0.005<sup>a</sup></b><br>(0–2.5)        | <b>0.6<sup>b</sup></b><br>(0–30.2)         | <b>1.1<sup>a, b</sup></b><br>(0–13.2)       |

Abbreviations: BCP, B-cell precursors; nPC, normal plasma cell; ‡ Mature B-cells (transitional/naïve B-cells plus memory B-cells); limit of detection of MRD of 0.0002% ( $2 \times 10^{-6}$ ); a *p*-value < 0.05 *vs.* HD, b *p* < 0.05 *vs.* MM at diagnosis (Mann Whitney-U test).

**Table S3.** Distribution of maturation-associated normal/residual B-cell and nPC cell populations in BM of MM patients studied at diagnosis and at different time points after therapy according to the patients' cytogenetic risk (standard *vs.* high risk).

| Cell population (%)                            | At diagnosis (n = 21)           |                              | End of Induction (n = 22)    |                               | Post ASCT (day + 100) (n = 45) |                             |
|------------------------------------------------|---------------------------------|------------------------------|------------------------------|-------------------------------|--------------------------------|-----------------------------|
|                                                | Standard risk (n = 18)          | High risk (n = 3)            | Standard risk (n = 12)       | High risk (n = 10)            | Standard risk (n = 35)         | High risk (n = 10)          |
| <b>Total B-cells</b>                           | <b>1</b><br>(0.4–2.1)           | <b>1.4</b><br>(0.5–3.3)      | <b>0.7</b><br>(0.25–2.7)     | <b>0.7</b><br>(0.3–5)         | <b>2.5</b><br>(0.6–11.4)       | <b>2.7</b><br>(1.1–4.4)     |
| <b>Pre-germinal center B-cells</b>             | <b>0.4</b><br>(0.07–1.7)        | <b>1.1</b><br>(0.1–2.2)      | <b>0.4</b><br>(0.1–2.7)      | <b>0.3</b><br>(0.1–4.5)       | <b>2.4</b><br>(0.5–11.2)       | <b>2.6</b><br>(1.07–4.2)    |
| BCP                                            | <b>0.009</b><br>(<0.0002–0.4)   | <b>0.4</b><br>(<0.0002–0.8)  | <b>0.2</b><br>(0.01–2.3)     | <b>0.07</b><br>(<0.0002–2.2)  | <b>1.2</b><br>(0.2–10.3)       | <b>1.4</b><br>(0.7–2.6)     |
| Stage I BCP                                    | <b>0.0003</b><br>(<0.0002–0.06) | <b>0.02</b><br>(<0.0002–0.1) | <b>0.02</b><br>(0.001–0.3)   | <b>0.02</b><br>(<0.0002–0.7)  | <b>0.2</b><br>(0.009–0.9)      | <b>0.1</b><br>(0.04–0.4)    |
| Stage II BCP                                   | <b>0.008</b><br>(<0.0002–0.4)   | <b>0.3</b><br>(<0.0002–0.7)  | <b>0.2</b><br>(0.01–2.1)     | <b>0.05</b><br>(<0.0002–2)    | <b>1</b><br>(0.1–9.4)          | <b>1.2</b><br>(0.5–2.3)     |
| Stage I/stage II BCP ratio                     | <b>0.01</b><br>(0–0.2)          | <b>0.07</b><br>(0–0.2)       | <b>0.1</b><br>(0.02–0.2)     | <b>0.3</b><br>(0–0.8)         | <b>0.1</b><br>(0.02–1.2)       | <b>0.1</b><br>(0.02–0.6)    |
| Transitional/naive B-cells                     | <b>0.4</b><br>(0.05–1.4)        | <b>0.3</b><br>(0.1–1.9)      | <b>0.2</b><br>(0.02–0.6)     | <b>0.2</b><br>(0.004–2.5)     | <b>1.3</b><br>(0.2–4.9)        | <b>1.1</b><br>(0.3–2.1)     |
| <b>Post-germinal center B-cells</b>            | <b>0.4</b><br>(0.09–1.2)        | <b>0.4</b><br>(0.2–1.1)      | <b>0.2</b><br>(0.08–0.6)     | <b>0.2</b><br>(0.03–0.6)      | <b>0.08</b><br>(0.02–0.5)      | <b>0.08</b><br>(0.03–0.2)   |
| Memory B-cells                                 | <b>0.07</b><br>(0.007–0.3)      | <b>0.09</b><br>(0.005–0.5)   | <b>0.07</b><br>(0.007–0.3)   | <b>0.09</b><br>(0.005–0.5)    | <b>0.03</b><br>(0.006–0.5)     | <b>0.03</b><br>(0.008–0.1)  |
| nPC                                            | <b>0.03</b><br>(0.005–0.5)      | <b>0.1</b><br>(0.01–0.1)     | <b>0.06</b><br>(0.02–0.4)    | <b>0.1</b><br>(0.008–0.4)     | <b>0.05</b><br>(0.002–0.2)     | <b>0.04</b><br>(0.01–0.2)   |
| CD19 <sup>+</sup> nPC                          | <b>0.03</b><br>(0.002–0.4)      | <b>0.07</b><br>(0.005–0.1)   | <b>0.05</b><br>(0.02–0.4)    | <b>0.07</b><br>(0.007–0.4)    | <b>0.04</b><br>(0.0008–0.2)    | <b>0.03</b><br>(0.01–0.2)   |
| CD19 <sup>-</sup> nPC                          | 0.005<br>(<0.0002–0.008)        | <b>0.05</b><br>(0.007–0.05)  | <b>0.009</b><br>(0.002–0.06) | <b>0.003</b><br>(0.0006–0.04) | <b>0.005</b><br>(0.003–0.06)   | <b>0.007</b><br>(0.02–0.05) |
| CD19 <sup>+</sup> /CD19 <sup>-</sup> nPC ratio | <b>4.5</b><br>(0–18.6)          | <b>1.4</b><br>(0.7–2.1)      | <b>6.9</b><br>(2.9–19.3)     | <b>7.2</b><br>(2.7–147)       | <b>6.9</b><br>(0–29.2)         | <b>8.3</b><br>(3.7–19.4)    |
| <b>Mature B-cells †</b>                        | <b>0.8</b><br>(0.1–1.8)         | <b>0.6</b><br>(0.3–2.8)      | <b>0.3</b><br>(0.03–0.7)     | <b>0.5</b><br>(0.009–2.6)     | <b>1.4</b><br>(0.3–5)          | <b>1.2</b><br>(0.3–2.2)     |
| <b>BCP/Mature B-cell ratio</b>                 | <b>0.004</b><br>(0–2.5)         | <b>0.1</b><br>(0–1.4)        | <b>0.9</b><br>(0.03–5.9)     | <b>0.2</b><br>(0–30.2)        | <b>0.9</b><br>(0.1–10.4)       | <b>1.5</b><br>(0.4–3.2)     |

Abbreviations: BCP, B-cell precursors; nPC, normal plasma cell; † Mature B-cells (transitional/naïve B-cells plus memory B-cells); limit of detection of MRD of 0.0002% ( $2 \times 10^{-6}$ ); \*,  $p < 0.05$  for comparison between MM samples standard risk *vs.* high-risk (Mann Whitney-U test). High-risk cytogenetic include del(17/17p), t(4;14), t(14;16) and/or, t(14;20).

**Table S4.** Distribution of maturation-associated normal/residual B-cell and nPC cell populations in BM of MM patients studied at day+100 post-autologous stem cell transplantation, according to the type of induction therapy received.

| Cell Population (%)                            | Post ASCT (day+100) (n=93)                           |                                                                  |
|------------------------------------------------|------------------------------------------------------|------------------------------------------------------------------|
|                                                | PI plus IMiDs plus steroids<br>(n = 43) <sup>a</sup> | PI plus steroids or<br>IMiDs plus steroids (n = 50) <sup>b</sup> |
| <b>Total B-cells</b>                           | <b>2.5</b><br>(1.1–11.4)                             | <b>4.3 *</b><br>(0.05–11)                                        |
| <b>Pre-germinal center B-cells</b>             | <b>2.4</b><br>(0.5–11.2)                             | <b>4 *</b><br>(0.003–11)                                         |
| BCP                                            | <b>1.2</b><br>(0.06–12.3)                            | <b>1.9 *</b><br>(0.002 -6.2)                                     |
| Stage I BCP                                    | <b>0.2</b><br>(0.002–0.9)                            | <b>0.2</b><br>(<0.0002 -0.6)                                     |
| Stage II BCP                                   | <b>1</b><br>(0.06–9.4)                               | <b>1.8 *</b><br>(0.002–6)                                        |
| Stage I/stage II BCP ratio                     | <b>0.1</b><br>(0.02 -1.2)                            | <b>0.8 *</b><br>(<0.0002–0.5)                                    |
| Transitional/naive B-cells                     | <b>1.3</b><br>(0.09–5)                               | <b>1.7 *</b><br>(0.0008–6)                                       |
| <b>Post-germinal center B-cells</b>            | <b>0.1</b><br>(0.02 -0.6)                            | <b>0.2 *</b><br>(0.009–0.9)                                      |
| Memory B-cells                                 | <b>0.03</b><br>(0.005–0.5)                           | <b>0.03</b><br>(0.005–0.2)                                       |
| nPC                                            | <b>0.05</b><br>(0.02–0.6)                            | <b>0.1 *</b><br>(0.008–0.8)                                      |
| CD19 <sup>+</sup> nPC                          | <b>0.04</b><br>(0.008–0.4)                           | <b>0.1 *</b><br>(<0.0002–0.8)                                    |
| CD19 <sup>-</sup> nPC                          | <b>0.007</b><br>(0.003–0.2)                          | <b>0.01</b><br>(<0.0002 -0.1)                                    |
| CD19 <sup>+</sup> /CD19 <sup>-</sup> nPC ratio | <b>6.3</b><br>(<0.0002–24.1)                         | <b>11</b><br>(<0.0002–42.4)                                      |
| <b>Mature B-cells ¥</b>                        | <b>1.3</b><br>(0.1–5)                                | <b>1.8 *</b><br>(0.004–6)                                        |
| <b>BCP/Mature B-cell ratio</b>                 | <b>0.9</b><br>(0.09–13.2)                            | <b>1.2</b><br>(<0.0002–4)                                        |
| <b>% (n/n) MRD+ status</b>                     | 60% (26/43)                                          | 58% (29/50)                                                      |
| <b>PFS in months</b>                           | 32                                                   | NR                                                               |

Abbreviations: BCP, B-cell precursors; nPC, normal plasma cell, MRD minimal residual disease, PFS progression free-survival; ¥ Mature B-cells (transitional/naïve B-cells plus memory B-cells); limit of detection of MRD of 0.0002% (2x10<sup>-6</sup>); \* *p* < 0.05 for comparison between different of types of protocols induction to prior ASCT (Mann Whitney-U test). <sup>a</sup> in this group was included: PI+IMiDs+steroids (n = 40), PI+IMiDs+steroid+MoAb (n = 1), PI+IMiDs+steroids+Chemotherapy (VDL-Page, n = 2); <sup>b</sup> in this group was included: PI+ cyclophosphamide+steroid (n = 22), cyclophosphamide+IMiDs+steroids (n = 19), PI+IMiDs+steroids+ cyclophosphamide (n = 3) PI+steroid (n = 3), IMiD+steroid (n = 2).
